# Supplementary material
Source: ML conference proceedings conference paper supplement (https://proceedings.mlr.press/v32/suna14.html)
Supplement: Supplementary file 1 [file suna14-supp.pdf]

# Proofs of “An Information Geometry of Statistical Manifold Learning”

Ke Sun      Stéphane Marchand-Maillet  
 Viper Group, Computer Vision & Multimedia Laboratory  
 University of Geneva, Switzerland  
 {Ke.Sun, Stephane.Marchand-Maillet}@unige.ch

## Notations

$\delta_{i_1, \dots, i_n} = 1$  if  $i_1 = \dots = i_n$ ;  $\delta_{i_1, \dots, i_n} = 0$  if otherwise.

## Proof of Lemma 3

*Proof.* Consider the coordinate transformation  $\theta_i = \log(p_i/p_0)$  introduced in section 1. The reverse mapping  $\boldsymbol{\theta} \rightarrow (p_1, \dots, p_n)$  is given by

$$p_\xi(\boldsymbol{\theta}) = \frac{\exp \theta_\xi}{\sum_{i=1}^n \exp \theta_i}.$$

Then,

$$\log p_\xi(\boldsymbol{\theta}) = \sum_{i=1}^n \theta_i \cdot \delta_{i\xi} - \log \left( \sum_{i=1}^n \exp \theta_i \right).$$

Hence,

$$\frac{\partial}{\partial \theta_i} \log p_\xi(\boldsymbol{\theta}) = \delta_{i\xi} - \frac{\exp \theta_i}{\sum_{i=1}^n \exp \theta_i} = \delta_{i\xi} - p_i(\boldsymbol{\theta}). \quad (21)$$

By definition of Fisher information metric (see section 1) and Eq.(21),

$$\begin{aligned} \mathfrak{G}_{ij}(\boldsymbol{\theta}) &= \sum_{\xi=1}^n p_\xi(\boldsymbol{\theta}) \left[ \frac{\partial}{\partial \theta_i} \log p_\xi(\boldsymbol{\theta}) \cdot \frac{\partial}{\partial \theta_j} \log p_\xi(\boldsymbol{\theta}) \right] = \sum_{\xi=1}^n p_\xi(\boldsymbol{\theta}) \left[ (\delta_{i\xi} - p_i(\boldsymbol{\theta})) \cdot (\delta_{j\xi} - p_j(\boldsymbol{\theta})) \right] \\ &= \sum_{\xi=1}^n p_\xi(\boldsymbol{\theta}) \delta_{ij\xi} - \sum_{\xi=1}^n p_\xi(\boldsymbol{\theta}) \delta_{i\xi} p_j(\boldsymbol{\theta}) - \sum_{\xi=1}^n p_\xi(\boldsymbol{\theta}) \delta_{j\xi} p_i(\boldsymbol{\theta}) + \sum_{\xi=1}^n p_\xi(\boldsymbol{\theta}) p_i(\boldsymbol{\theta}) p_j(\boldsymbol{\theta}) \\ &= \delta_{ij} p_i(\boldsymbol{\theta}) - p_i(\boldsymbol{\theta}) p_j(\boldsymbol{\theta}) - p_j(\boldsymbol{\theta}) p_i(\boldsymbol{\theta}) + p_i(\boldsymbol{\theta}) p_j(\boldsymbol{\theta}) = \delta_{ij} p_i(\boldsymbol{\theta}) - p_i(\boldsymbol{\theta}) p_j(\boldsymbol{\theta}). \end{aligned}$$

□

## Proof of Theorem 4

We only prove the pullback metric with respect to eq. (1), the sample-wise normalization. The proof of the metric with respect to eq. (2), the matrix-wise normalization, is similar.

*Proof.* Consider a differentiable mapping  $\tilde{\boldsymbol{\theta}}(\mathbf{x}) = (\theta_1(\mathbf{x}), \dots, \theta_{n-2}(\mathbf{x}), \varepsilon)$  from a smooth manifold  $\mathcal{C}$  to  $\mathcal{S}^{n-1}$ , where  $\mathcal{C}$  is parametrized by a coordinate system  $\{\phi_i\}$ , and  $\varepsilon > 0$  is constant. The pullback metric  $\tilde{g}$  is given by

$$\left\langle \frac{\partial}{\partial \phi_i}, \frac{\partial}{\partial \phi_j} \right\rangle_{\tilde{g}} = \left\langle \sum_{k=1}^{n-2} \frac{\partial \theta_k}{\partial \phi_i} \frac{\partial}{\partial \theta_k}, \sum_{l=1}^{n-2} \frac{\partial \theta_l}{\partial \phi_j} \frac{\partial}{\partial \theta_l} \right\rangle_{\mathfrak{G}^{n-1}(\tilde{\boldsymbol{\theta}})} = \sum_{k=1}^{n-2} \sum_{l=1}^{n-2} \frac{\partial \theta_k}{\partial \phi_i} \frac{\partial \theta_l}{\partial \phi_j} \mathfrak{G}_{kl}^{n-1}(\tilde{\boldsymbol{\theta}}), \quad (22)$$

where  $\mathfrak{G}^{n-1}$  denotes FIM with respect to the canonical parameters  $\theta_1, \dots, \theta_{n-1}$  on  $\mathcal{S}^{n-1}$ . On the other hand, consider the mapping  $\boldsymbol{\theta}(\mathbf{x}) = (\theta_1(\mathbf{x}), \dots, \theta_{n-2}(\mathbf{x}))$  from  $\mathcal{C}$  to  $\mathcal{S}^{n-2}$ . The corresponding pullback metric  $g$  is

$$\left\langle \frac{\partial}{\partial \phi_i}, \frac{\partial}{\partial \phi_j} \right\rangle_g = \left\langle \sum_{k=1}^{n-2} \frac{\partial \theta_k}{\partial \phi_i} \frac{\partial}{\partial \theta_k}, \sum_{l=1}^{n-2} \frac{\partial \theta_l}{\partial \phi_j} \frac{\partial}{\partial \theta_l} \right\rangle_{\mathfrak{G}^{n-2}(\boldsymbol{\theta})} = \sum_{k=1}^{n-2} \sum_{l=1}^{n-2} \frac{\partial \theta_k}{\partial \phi_i} \frac{\partial \theta_l}{\partial \phi_j} \mathfrak{G}_{kl}^{n-2}(\boldsymbol{\theta}), \quad (23)$$

where  $\mathfrak{G}^{n-2}$  is FIM with respect to  $\theta_1, \dots, \theta_{n-2}$  on one of  $\mathcal{S}^{n-1}$ 's faces where  $\theta_{n-1} \rightarrow -\infty$  and  $p_{n-1} \rightarrow 0$ . Note, from lemma 3, the information geometry on the statistical simplex  $\mathcal{S}^{n-1}$  is continuous on its boundaries, in the sense that

$$\lim_{\theta_{n-1} \rightarrow -\infty} \mathfrak{G}^{n-1}(\tilde{\boldsymbol{\theta}}) = \begin{bmatrix} \mathfrak{G}^{n-2}(\boldsymbol{\theta}) & \mathbf{0} \\ \mathbf{0} & 0 \end{bmatrix}. \quad (24)$$

Therefore,

$$\lim_{\varepsilon \rightarrow -\infty} \left\langle \frac{\partial}{\partial \phi_i}, \frac{\partial}{\partial \phi_j} \right\rangle_{\tilde{g}} = \left\langle \frac{\partial}{\partial \phi_i}, \frac{\partial}{\partial \phi_j} \right\rangle_g. \quad (25)$$

This allows the following strategy to derive the pullback metric with respect to eq. (1). We first map  $\forall \mathbf{X} \in \mathcal{M}^r$  into  $\mathcal{S}^{n-1}$  following the mapping

$$\tilde{p}_{j|i}(\mathbf{X}) = \frac{\exp(-s_{ij}(\mathbf{X}))}{\varepsilon + \sum_{j \neq i} \exp(-s_{ij}(\mathbf{X}))} \quad (\forall j \neq i), \quad \tilde{p}_{i|i} = \frac{\varepsilon}{\varepsilon + \sum_{j \neq i} \exp(-s_{ij}(\mathbf{X}))}, \quad (26)$$

where  $\varepsilon > 0$  is a small constant. Then, we pullback FIM along the above  $\tilde{p}$ . Finally, we take the limit  $\varepsilon \rightarrow 0$  on this pullback metric. According to eq. (25), the resulting metric is the same as pulling-back  $p$  with respect to eq. (1). Such a strategy makes the derivation simpler, because one only has to apply FIM inside  $\mathcal{S}^{n-1}$ .

Eq. (26) features a mapping from  $\mathcal{M}^r$  to the product manifold  $(\mathcal{S}^{n-1})^n$ . For the  $i$ 'th simplex in this product, we choose  $\tilde{p}_{i|i}$  to be the ‘‘reference probability’’ (see section 2). Note, the pullback metric does not vary with such a specific choice of coordinate system. Then, the canonical parameters of the  $i$ 'th simplex are given by

$$\tilde{\theta}_{j|i} = \log(\tilde{p}_{j|i}/\tilde{p}_{i|i}) = -s_{ij}(\mathbf{X}) - \log \varepsilon \quad (\forall j \neq i). \quad (27)$$

By Lemma 3, the corresponding FIM is

$$\mathfrak{G}_{kl}^{(i)} = \tilde{p}_{k|i} \delta_{kl} - \tilde{p}_{k|i} \cdot \tilde{p}_{l|i},$$

where the superscript ‘‘(i)’’ means FIM is computed with respect to  $\tilde{\theta}_{j|i}, \forall j \neq i$  on the  $i$ 'th simplex. Then,  $\forall \mathbf{u} = (u_1, \dots, u_{i-1}, u_{i+1}, \dots, u_n), \mathbf{v} = (v_1, \dots, v_{i-1}, v_{i+1}, \dots, v_n) \in \mathfrak{R}^{n-1}$ , we have

$$\mathbf{u}^T \mathfrak{G}^{(i)} \mathbf{v} = \sum_{j:j \neq i} \tilde{p}_{j|i} u_j v_j - \sum_{j:j \neq i} \tilde{p}_{j|i} u_j \sum_{j:j \neq i} \tilde{p}_{j|i} v_j. \quad (28)$$

Note, the Riemannian metric on the product manifold  $(\mathcal{S}^{n-1})^n$  is a product metric [Jost(2008)] in a block diagonal form. Then, we have

$$\begin{aligned}
\tilde{g}_{ij}(\mathbf{X}) &= \begin{pmatrix} \frac{\partial \tilde{\theta}_{\cdot|1}}{\partial \varphi_i} \\ \frac{\partial \tilde{\theta}_{\cdot|2}}{\partial \varphi_i} \\ \vdots \\ \frac{\partial \tilde{\theta}_{\cdot|n}}{\partial \varphi_i} \end{pmatrix}^T \begin{bmatrix} \mathfrak{G}^{(1)} & \mathbf{0} & \cdots & \mathbf{0} \\ \mathbf{0} & \mathfrak{G}^{(2)} & \cdots & \mathbf{0} \\ \vdots & \vdots & \ddots & \vdots \\ \mathbf{0} & \mathbf{0} & \cdots & \mathfrak{G}^{(n)} \end{bmatrix} \begin{pmatrix} \frac{\partial \tilde{\theta}_{\cdot|1}}{\partial \varphi_j} \\ \frac{\partial \tilde{\theta}_{\cdot|2}}{\partial \varphi_j} \\ \vdots \\ \frac{\partial \tilde{\theta}_{\cdot|n}}{\partial \varphi_j} \end{pmatrix} \\
&= \sum_{k=1}^n \left( \frac{\partial \tilde{\theta}_{\cdot|k}}{\partial \varphi_i} \right)^T \mathfrak{G}^{(k)} \left( \frac{\partial \tilde{\theta}_{\cdot|k}}{\partial \varphi_j} \right) \\
&= \sum_{k=1}^n \left[ \sum_{l:l \neq k} \tilde{p}_{l|k} \left( \frac{\partial \tilde{\theta}_{l|k}}{\partial \varphi_i} \cdot \frac{\partial \tilde{\theta}_{l|k}}{\partial \varphi_j} \right) - \left( \sum_{l:l \neq k} \tilde{p}_{l|k} \frac{\partial \tilde{\theta}_{l|k}}{\partial \varphi_i} \right) \left( \sum_{l:l \neq k} \tilde{p}_{l|k} \frac{\partial \tilde{\theta}_{l|k}}{\partial \varphi_j} \right) \right] \\
&= \sum_{k=1}^n \left[ \sum_{l:l \neq k} \tilde{p}_{l|k} \left( \frac{\partial s_{kl}}{\partial \varphi_i} \cdot \frac{\partial s_{kl}}{\partial \varphi_j} \right) - \left( \sum_{l:l \neq k} \tilde{p}_{l|k} \frac{\partial s_{kl}}{\partial \varphi_i} \right) \left( \sum_{l:l \neq k} \tilde{p}_{l|k} \frac{\partial s_{kl}}{\partial \varphi_j} \right) \right].
\end{aligned}$$

Then, we let  $\epsilon \rightarrow 0$  and get exactly the metric in theorem 4.  $\square$

## Proof of Corollary 5

*Proof.* By theorem 4,

$$\begin{aligned}
\left\langle \frac{\partial}{\partial \mathbf{x}_i}, \frac{\partial}{\partial \mathbf{x}_i} \right\rangle_{\tilde{g}(\mathbf{X})} &= \sum_{k=1}^n \left[ \sum_{l=1}^n p_{l|k} \left( \frac{\partial \|\mathbf{x}_k - \mathbf{x}_l\|^2}{\partial \mathbf{x}_i} \right) \left( \frac{\partial \|\mathbf{x}_k - \mathbf{x}_l\|^2}{\partial \mathbf{x}_i} \right)^T \right. \\
&\quad \left. - \left( \sum_{l=1}^n p_{l|k} \frac{\partial \|\mathbf{x}_k - \mathbf{x}_l\|^2}{\partial \mathbf{x}_i} \right) \left( \sum_{l=1}^n p_{l|k} \frac{\partial \|\mathbf{x}_k - \mathbf{x}_l\|^2}{\partial \mathbf{x}_i} \right)^T \right] \\
&= 4 \sum_{l=1}^n p_{l|i} (\mathbf{x}_i - \mathbf{x}_l) (\mathbf{x}_i - \mathbf{x}_l)^T + 4 \sum_{k=1}^n p_{i|k} (\mathbf{x}_i - \mathbf{x}_k) (\mathbf{x}_i - \mathbf{x}_k)^T \\
&\quad - 4 \left( \sum_{l=1}^n p_{l|i} (\mathbf{x}_i - \mathbf{x}_l) \right) \left( \sum_{l=1}^n p_{l|i} (\mathbf{x}_i - \mathbf{x}_l) \right)^T - 4 \sum_{k:k \neq i} \left( p_{i|k} (\mathbf{x}_i - \mathbf{x}_k) \cdot p_{i|k} (\mathbf{x}_i - \mathbf{x}_k)^T \right) \\
&= 4 \sum_{j=1}^n p_{j|i} (\mathbf{x}_i - \mathbf{x}_j) (\mathbf{x}_i - \mathbf{x}_j)^T - 4 \left( \mathbf{x}_i - \sum_{j=1}^n p_{j|i} \mathbf{x}_j \right) \left( \mathbf{x}_i - \sum_{j=1}^n p_{j|i} \mathbf{x}_j \right)^T \\
&\quad + 4 \sum_{j=1}^n (p_{i|j} - p_{i|j}^2) (\mathbf{x}_i - \mathbf{x}_j) (\mathbf{x}_i - \mathbf{x}_j)^T \\
&= 4 \left\{ \sum_{j=1}^n p_{j|i} \mathbf{x}_j \mathbf{x}_j^T - \left( \sum_{j=1}^n p_{j|i} \mathbf{x}_j \right) \left( \sum_{j=1}^n p_{j|i} \mathbf{x}_j \right)^T \right\} + 4 \sum_{j=1}^n p_{i|j} (1 - p_{i|j}) (\mathbf{x}_i - \mathbf{x}_j) (\mathbf{x}_i - \mathbf{x}_j)^T.
\end{aligned}$$

$\square$

## Proof of Corollary 6

*Proof.*  $\mathcal{O}_{\mathbf{X}, \mathfrak{t}}^n(\boldsymbol{\tau})$  is equipped with a global coordinate system  $\boldsymbol{\tau} = (\tau_1, \dots, \tau_n)$ . By theorem 4, the Riemannian metric corresponding to eq. (3) is given by

$$\begin{aligned} g_{ij}(\mathbf{X}) &= \sum_{k=1}^n \left[ \sum_{l \in \mathfrak{ENN}_k} p_{l|k} \left( \frac{\partial(\tau_k s_{kl}^{\mathbf{X}})}{\partial \tau_i} \cdot \frac{\partial(\tau_k s_{kl}^{\mathbf{X}})}{\partial \tau_j} \right) - \sum_{l \in \mathfrak{ENN}_k} p_{l|k} \frac{\partial(\tau_k s_{kl}^{\mathbf{X}})}{\partial \tau_i} \cdot \sum_{l \in \mathfrak{ENN}_k} p_{l|k} \frac{\partial(\tau_k s_{kl}^{\mathbf{X}})}{\partial \tau_j} \right] \\ &= \sum_{k=1}^n \left[ \delta_{ijk} \sum_{l \in \mathfrak{ENN}_k} p_{l|k} (s_{kl}^{\mathbf{X}})^2 - \delta_{ijk} \left( \sum_{l \in \mathfrak{ENN}_k} p_{l|k} s_{kl}^{\mathbf{X}} \right)^2 \right] \\ &= \delta_{ij} \left[ \sum_{l \in \mathfrak{ENN}_i} p_{l|i} (s_{il}^{\mathbf{X}})^2 - \left( \sum_{l \in \mathfrak{ENN}_i} p_{l|i} s_{il}^{\mathbf{X}} \right)^2 \right]. \end{aligned} \quad (29)$$

On the other hand,

$$\begin{aligned} -\frac{\partial}{\partial \tau_i} \left( \sum_{j \in \mathfrak{ENN}_i} p_{j|i}(\tau_i) s_{ij}^{\mathbf{X}} \right) &= -\frac{\partial}{\partial \tau_i} \sum_{j \in \mathfrak{ENN}_i} \frac{\exp(-\tau_i s_{ij}^{\mathbf{X}})}{\sum_{\xi \in \mathfrak{ENN}_i} \exp(-\tau_i s_{i\xi}^{\mathbf{X}})} s_{ij}^{\mathbf{X}} \\ &= -\sum_{j \in \mathfrak{ENN}_i} \left[ \frac{\exp(-\tau_i s_{ij}^{\mathbf{X}})}{\sum_{\xi \in \mathfrak{ENN}_i} \exp(-\tau_i s_{i\xi}^{\mathbf{X}})} (-s_{ij}^{\mathbf{X}}) s_{ij}^{\mathbf{X}} - \frac{\exp(-\tau_i s_{ij}^{\mathbf{X}}) \cdot s_{ij}^{\mathbf{X}}}{\left( \sum_{\xi \in \mathfrak{ENN}_i} \exp(-\tau_i s_{i\xi}^{\mathbf{X}}) \right)^2} \sum_{\xi \in \mathfrak{ENN}_i} \exp(-\tau_i s_{i\xi}^{\mathbf{X}}) (-s_{i\xi}^{\mathbf{X}}) \right] \\ &= \sum_{j \in \mathfrak{ENN}_i} p_{j|i}(\tau_i) (s_{ij}^{\mathbf{X}})^2 - \sum_{j \in \mathfrak{ENN}_i} p_{j|i}(\tau_i) s_{ij}^{\mathbf{X}} \sum_{\xi \in \mathfrak{ENN}_i} p_{\xi|i}(\tau_i) s_{i\xi}^{\mathbf{X}}. \end{aligned} \quad (30)$$

From eq. (29) and eq. (30),

$$g_{ij}(\mathbf{X}) = -\delta_{ij} \frac{\partial}{\partial \tau_i} \left( \sum_{j \in \mathfrak{ENN}_i} p_{j|i}(\tau_i) s_{ij}^{\mathbf{X}} \right).$$

The proof for the metric corresponding to eq. (4) is similar. Note,

$$\frac{\partial}{\partial \tau_i} s_{kl}^t = \begin{cases} \delta_{ki} s_{kl}^t / (\tau_k s_{kl}^t + 1) & \text{if } l \in \mathfrak{ENN}_k; \\ 0 & \text{if otherwise.} \end{cases} \quad (31)$$

Denote  $\mathfrak{d}_{kl} = s_{kl}^t / (\tau_k s_{kl}^t + 1)$ . Then, by theorem 4,

$$\begin{aligned} g_{ij}^t(\mathbf{X}) &= \sum_{k=1}^n \left[ \sum_{l \in \mathfrak{ENN}_k} p_{l|k} \left( \frac{\partial s_{kl}^t}{\partial \tau_i} \cdot \frac{\partial s_{kl}^t}{\partial \tau_j} \right) - \sum_{l \in \mathfrak{ENN}_k} p_{l|k} \frac{\partial s_{kl}^t}{\partial \tau_i} \cdot \sum_{l \in \mathfrak{ENN}_k} p_{l|k} \frac{\partial s_{kl}^t}{\partial \tau_j} \right] \\ &= \sum_{k=1}^n \left[ \delta_{ijk} \sum_{l \in \mathfrak{ENN}_k} p_{l|k} \mathfrak{d}_{kl}^2 - \delta_{ijk} \left( \sum_{l \in \mathfrak{ENN}_k} p_{l|k} \mathfrak{d}_{kl} \right)^2 \right] \\ &= \delta_{ij} \left[ \sum_{l \in \mathfrak{ENN}_i} p_{l|i} \mathfrak{d}_{il}^2 - \left( \sum_{l \in \mathfrak{ENN}_i} p_{l|i} \mathfrak{d}_{il} \right)^2 \right]. \end{aligned} \quad (32)$$

□

## Proof of Proposition 8

*Proof.* By eq. (3) and corollary 6,

$$\begin{aligned} \int_0^\infty \sqrt{g_i(t)} dt &= \int_0^\infty dt \sqrt{\sum_{j \in \mathfrak{NN}_i} \left[ \frac{\exp(-ts_{ij}^{\mathbf{X}})}{\sum_{j \in \mathfrak{NN}_i} \exp(-ts_{ij}^{\mathbf{X}})} (s_{ij}^{\mathbf{X}})^2 \right] - \left[ \sum_{j \in \mathfrak{NN}_i} \frac{\exp(-ts_{ij}^{\mathbf{X}})}{\sum_{j \in \mathfrak{NN}_i} \exp(-ts_{ij}^{\mathbf{X}})} s_{ij}^{\mathbf{X}} \right]^2} \\ &= \int_0^\infty \sqrt{\frac{\sum_{j \in \mathfrak{NN}_i} \exp(-ts_{ij}^{\mathbf{X}}) \cdot (d(ts_{ij}^{\mathbf{X}}))^2}{\sum_{j \in \mathfrak{NN}_i} \exp(-ts_{ij}^{\mathbf{X}})} - \left[ \frac{\sum_{j \in \mathfrak{NN}_i} \exp(-ts_{ij}^{\mathbf{X}}) \cdot d(ts_{ij}^{\mathbf{X}})}{\sum_{j \in \mathfrak{NN}_i} \exp(-ts_{ij}^{\mathbf{X}})} \right]^2} dt. \end{aligned} \quad (33)$$

Note, in the above integration,  $t$  and  $s_{ij}^{\mathbf{X}}$  always appear together in the term  $(t \cdot s_{ij}^{\mathbf{X}})$ . Assume  $\bar{\mathbf{X}} = \lambda \mathbf{X}$ . Then  $s_{ij}^{\mathbf{X}}$  is multiplied by  $\lambda^2$ . We let  $\bar{t} = \lambda^2 t$ . Then the LAI integration of  $\bar{\mathbf{X}}$  changes to  $\int_0^\infty \sqrt{g_i(\bar{t})} d\bar{t}$ , which has the same value as eq. (33). By definition 7,

$$|\mathcal{O}_\mathfrak{k}|(\lambda \mathbf{X}) = |\mathcal{O}_\mathfrak{k}|(\mathbf{X}). \quad (34)$$

□

## Proof of Proposition 9

*Proof.* Note,  $\int_0^\infty \sqrt{g_i(t)} dt$  is the length of a curve connecting the uniform distribution

$$p_{j|i} = \begin{cases} 1/\mathfrak{k} & \text{if } j \in \mathfrak{NN}_i; \\ 0 & \text{if otherwise,} \end{cases}$$

and the deterministic distribution

$$p_{j|i} = \begin{cases} 1 & \text{if } j \text{ is the nearest neighbour of } i; \\ 0 & \text{if otherwise.} \end{cases}$$

This length is lower bounded by the geodesic distance [Lebanon(2003)]. Therefore

$$\forall i, \quad \int_0^\infty \sqrt{g_i(t)} dt \geq \arccos(1/\sqrt{\mathfrak{k}}). \quad (35)$$

By eq. (5),

$$|\mathcal{O}_\mathfrak{k}|(\mathbf{X}) = \frac{1}{n} \sum_{i=1}^n \int_0^\infty \sqrt{g_i(t)} dt \geq \arccos(1/\sqrt{\mathfrak{k}}). \quad (36)$$

In the following, we prove that LAI always has a finite value. Let  $s_{i0}^{\mathbf{X}} = \min_{j:j \neq i} s_{ij}^{\mathbf{X}}$  be the square distance between  $\mathbf{x}_i$  and its 1NN,  $r_i^{\mathbf{X}} = \min_{j:s_{ij}^{\mathbf{X}} > s_{i0}^{\mathbf{X}}} |s_{ij}^{\mathbf{X}} - s_{i0}^{\mathbf{X}}|$ , and  $R_i^{\mathbf{X}} = \max_j |s_{ij}^{\mathbf{X}} - s_{i0}^{\mathbf{X}}|$ . By corollary 6,

$$\begin{aligned} g_i(t) &\leq \sum_{j \in \mathfrak{NN}_i} p_{j|i}(t) (s_{ij}^{\mathbf{X}} - s_{i0}^{\mathbf{X}})^2 = \sum_{j \in \mathfrak{NN}_i} \frac{\exp(-ts_{ij}^{\mathbf{X}})}{\sum_{j \in \mathfrak{NN}_i} \exp(-ts_{ij}^{\mathbf{X}})} (s_{ij}^{\mathbf{X}} - s_{i0}^{\mathbf{X}})^2 \\ &= \sum_{j \in \mathfrak{NN}_i} \frac{\exp(-t(s_{ij}^{\mathbf{X}} - s_{i0}^{\mathbf{X}}))}{\sum_{j \in \mathfrak{NN}_i} \exp(-t(s_{ij}^{\mathbf{X}} - s_{i0}^{\mathbf{X}}))} (s_{ij}^{\mathbf{X}} - s_{i0}^{\mathbf{X}})^2 \\ &\leq \sum_{j \in \mathfrak{NN}_i} \exp(-t(s_{ij}^{\mathbf{X}} - s_{i0}^{\mathbf{X}})) (s_{ij}^{\mathbf{X}} - s_{i0}^{\mathbf{X}})^2 \leq (\mathfrak{k} - 2) \exp(-tr_i^{\mathbf{X}}) (R_i^{\mathbf{X}})^2. \end{aligned}$$

Hence,

$$\int_0^\infty \sqrt{g_i(t)} dt \leq \sqrt{\mathfrak{k} - 2R_i^{\mathbf{X}}} \int_0^\infty \exp(-tr_i^{\mathbf{X}}/2) dt = 2\sqrt{\mathfrak{k} - 2R_i^{\mathbf{X}}}/r_i^{\mathbf{X}}.$$

By definition 7,  $|\mathcal{O}_{\mathfrak{k}}(\mathbf{X})| < \infty$ . □

## Proof of Corollary 10

*Proof.*  $\mathcal{H}_{\mathbf{Y}, \mathbf{Z}, \mathfrak{k}}^{2n}$  has a global coordinate system  $(a_1, b_1, \dots, a_n, b_n)$ . From eq. (6),

$$\forall i = 1, \dots, n, \quad \frac{\partial s_{kl}(\mathbf{a}, \mathbf{b})}{\partial a_i} = \begin{cases} \delta_{ki} s_{kl}^{\mathbf{Y}} & \text{if } l \in \mathfrak{kNN}_k; \\ 0 & \text{if otherwise,} \end{cases} \quad (37)$$

and

$$\forall i = 1, \dots, n, \quad \frac{\partial s_{kl}(\mathbf{a}, \mathbf{b})}{\partial b_i} = \begin{cases} \delta_{ki} s_{kl}^{\mathbf{Z}} & \text{if } l \in \mathfrak{kNN}_k; \\ 0 & \text{if otherwise.} \end{cases} \quad (38)$$

By theorem 4, the Riemannian metric  $g$  of  $\mathcal{H}_{\mathbf{Y}, \mathbf{Z}, \mathfrak{k}}^{2n}$  with respect to eq. (6) is given by

$$\begin{aligned} \langle \partial a_i, \partial a_j \rangle_g &= \sum_{k=1}^n \left[ \sum_{l: l \in \mathfrak{kNN}_k} p_{l|k} \left( \delta_{ki} s_{kl}^{\mathbf{Y}} \cdot \delta_{kj} s_{kl}^{\mathbf{Y}} \right) \right. \\ &\quad \left. - \left( \sum_{l: l \in \mathfrak{kNN}_k} p_{l|k} \delta_{ki} s_{kl}^{\mathbf{Y}} \right) \left( \sum_{l: l \in \mathfrak{kNN}_k} p_{l|k} \delta_{kj} s_{kl}^{\mathbf{Y}} \right) \right] \\ &= \delta_{ij} \sum_{l: l \in \mathfrak{kNN}_i} p_{l|i} (s_{il}^{\mathbf{Y}})^2 - \delta_{ij} \left( \sum_{l: l \in \mathfrak{kNN}_i} p_{l|i} s_{il}^{\mathbf{Y}} \right)^2, \end{aligned} \quad (39)$$

$$\begin{aligned} \langle \partial b_i, \partial b_j \rangle_g &= \sum_{k=1}^n \left[ \sum_{l: l \in \mathfrak{kNN}_k} p_{l|k} \left( \delta_{ki} s_{kl}^{\mathbf{Z}} \cdot \delta_{kj} s_{kl}^{\mathbf{Z}} \right) \right. \\ &\quad \left. - \left( \sum_{l: l \in \mathfrak{kNN}_k} p_{l|k} \delta_{ki} s_{kl}^{\mathbf{Z}} \right) \left( \sum_{l: l \in \mathfrak{kNN}_k} p_{l|k} \delta_{kj} s_{kl}^{\mathbf{Z}} \right) \right] \\ &= \delta_{ij} \sum_{l: l \in \mathfrak{kNN}_i} p_{l|i} (s_{il}^{\mathbf{Z}})^2 - \delta_{ij} \left( \sum_{l: l \in \mathfrak{kNN}_i} p_{l|i} s_{il}^{\mathbf{Z}} \right)^2, \end{aligned} \quad (40)$$

$$\begin{aligned} \langle \partial a_i, \partial b_j \rangle_g &= \sum_{k=1}^n \left[ \sum_{l: l \in \mathfrak{kNN}_k} p_{l|k} \left( \delta_{ki} s_{kl}^{\mathbf{Y}} \cdot \delta_{kj} s_{kl}^{\mathbf{Z}} \right) \right. \\ &\quad \left. - \left( \sum_{l: l \in \mathfrak{kNN}_k} p_{l|k} \delta_{ki} s_{kl}^{\mathbf{Y}} \right) \left( \sum_{l: l \in \mathfrak{kNN}_k} p_{l|k} \delta_{kj} s_{kl}^{\mathbf{Z}} \right) \right] \\ &= \delta_{ij} \sum_{l: l \in \mathfrak{kNN}_i} p_{l|i} s_{il}^{\mathbf{Y}} s_{il}^{\mathbf{Z}} \\ &\quad - \delta_{ij} \left( \sum_{l: l \in \mathfrak{kNN}_i} p_{l|i} s_{il}^{\mathbf{Y}} \right) \left( \sum_{l: l \in \mathfrak{kNN}_i} p_{l|i} s_{il}^{\mathbf{Z}} \right). \end{aligned} \quad (41)$$

The proof of the Riemannian metric corresponding to eq. (7) is similar and is omitted. □

## Proof of Proposition 11

*Proof.* The Jacobi matrix of the mapping  $(a, b) \rightarrow (a_1, b_1, \dots, a_n, b_n)$  is given by

$$J = \begin{bmatrix} \tau_1(\mathbf{Y}, \kappa) & 0 \\ 0 & \tau_1(\mathbf{Z}, \kappa) \\ \vdots & \vdots \\ \tau_n(\mathbf{Y}, \kappa) & 0 \\ 0 & \tau_n(\mathbf{Z}, \kappa) \end{bmatrix}.$$

Therefore, the Riemannian metric of the submanifold  $\bar{\mathcal{H}}_{\mathbf{Y}, \mathbf{Z}, \ell, \kappa}$  is

$$J^T g(\mathbf{c}) J = \sum_{i=1}^n \begin{bmatrix} \tau_i^2(\mathbf{Y}, \kappa) g_{aa}^i & \tau_i(\mathbf{Y}, \kappa) \tau_i(\mathbf{Z}, \kappa) g_{ab}^i \\ \tau_i(\mathbf{Y}, \kappa) \tau_i(\mathbf{Z}, \kappa) g_{ba}^i & \tau_i^2(\mathbf{Z}, \kappa) g_{bb}^i \end{bmatrix}.$$

The corresponding Riemannian volume element is given by

$$v(a, b) = \sqrt{\left( \sum_{i=1}^n \tau_i^2(\mathbf{Y}, \kappa) g_{aa}^i \right) \left( \sum_{i=1}^n \tau_i^2(\mathbf{Z}, \kappa) g_{bb}^i \right) - \left( \sum_{i=1}^n \tau_i(\mathbf{Y}, \kappa) \tau_i(\mathbf{Z}, \kappa) g_{ab}^i \right)^2}. \quad (42)$$

The volume (area) of some  $\Omega$  on  $\bar{\mathcal{H}}_{\mathbf{Y}, \mathbf{Z}, \ell, \kappa}$  is

$$\begin{aligned} |\bar{\mathcal{H}}_{\ell, \kappa, \Omega}|(\mathbf{Y}, \mathbf{Z}) &= \iint_{\Omega} v(a, b) \, da \, db \\ &= \iint_{\Omega} \sqrt{\left( \sum_{i=1}^n \tau_i^2(\mathbf{Y}, \kappa) g_{aa}^i \right) \left( \sum_{i=1}^n \tau_i^2(\mathbf{Z}, \kappa) g_{bb}^i \right) - \left( \sum_{i=1}^n \tau_i(\mathbf{Y}, \kappa) \tau_i(\mathbf{Z}, \kappa) g_{ab}^i \right)^2} \, da \, db. \end{aligned}$$

□

## Proof of Proposition 12

*Proof.* We only show that  $\forall \mathbf{Y}, \forall \mathbf{Z}, \forall \lambda_y, |\bar{\mathcal{H}}_{\lambda_y \mathbf{Y}, \mathbf{Z}, \ell, \kappa}| = |\bar{\mathcal{H}}_{\mathbf{Y}, \mathbf{Z}, \ell, \kappa}|$ . The proof of the invariance of  $|\bar{\mathcal{H}}_{\mathbf{Y}, \mathbf{Z}, \ell, \kappa}|$  with respect to the scaling of  $\mathbf{Z}$  is similar. By the definition of  $\tau_i(\mathbf{Y}, \kappa)$ ,

$$\tau_i(\lambda_y \mathbf{Y}, \kappa) s_{ij}^{\lambda_y \mathbf{Y}} = \tau_i(\mathbf{Y}, \kappa) s_{ij}^{\mathbf{Y}}.$$

Therefore, the term

$$\begin{aligned} \sum_{i=1}^n \tau_i^2(\mathbf{Y}, \kappa) g_{aa}^i &= \sum_{i=1}^n \sum_{j \in \mathfrak{NN}_i} \frac{\exp(-a \tau_i(\mathbf{Y}, \kappa) s_{ij}^{\mathbf{Y}} - b_i s_{ij}^{\mathbf{Z}})}{\sum_{j \in \mathfrak{NN}_i} \exp(-a \tau_i(\mathbf{Y}, \kappa) s_{ij}^{\mathbf{Y}} - b_i s_{ij}^{\mathbf{Z}})} (\tau_i(\mathbf{Y}, \kappa) s_{ij}^{\mathbf{Y}})^2 \\ &\quad - \sum_{i=1}^n \left( \sum_{j \in \mathfrak{NN}_i} \frac{\exp(-a \tau_i(\mathbf{Y}, \kappa) s_{ij}^{\mathbf{Y}} - b_i s_{ij}^{\mathbf{Z}})}{\sum_{j \in \mathfrak{NN}_i} \exp(-a \tau_i(\mathbf{Y}, \kappa) s_{ij}^{\mathbf{Y}} - b_i s_{ij}^{\mathbf{Z}})} \tau_i(\mathbf{Y}, \kappa) s_{ij}^{\mathbf{Y}} \right)^2 \end{aligned}$$

is invariant to the scaling of  $\mathbf{Y}$ . Similarly, the values of  $\sum_{i=1}^n \tau_i^2(\mathbf{Z}, \kappa) g_{bb}^i$  and  $\sum_{i=1}^n \tau_i(\mathbf{Y}, \kappa) \tau_i(\mathbf{Z}, \kappa) g_{ab}^i$  do not change when  $\mathbf{Y}$  is scaled up or down. According to eq. (42), the Riemannian volume element is invariant to the scaling of  $\mathbf{Y}$ . Hence,  $\forall \mathbf{Y}, \forall \mathbf{Z}, \forall \lambda_y, |\bar{\mathcal{H}}_{\ell, \kappa, \Omega}|(\lambda_y \mathbf{Y}, \mathbf{Z}) = |\bar{\mathcal{H}}_{\ell, \kappa, \Omega}|(\mathbf{Y}, \mathbf{Z})$ . □

## Proof of Proposition 13

*Proof.* The “only if” part of the proof is trivial (zero volume implies zero density somewhere). We prove the “if” part as follows. By noting that each  $2 \times 2$  diagonal block of  $g(\mathbf{c})$  is a covariance matrix, we have the inequality

$$\sum_{i=1}^n \tau_i^2(\mathbf{Y}, \kappa) g_{aa}^i \sum_{i=1}^n \tau_i^2(\mathbf{Z}, \kappa) g_{bb}^i \geq \left( \sum_{i=1}^n \tau_i(\mathbf{Y}, \kappa) \tau_i(\mathbf{Z}, \kappa) \sqrt{g_{aa}^i g_{bb}^i} \right)^2 \geq \left( \sum_{i=1}^n \tau_i(\mathbf{Y}, \kappa) \tau_i(\mathbf{Z}, \kappa) g_{ab}^i \right)^2. \quad (43)$$

Assume  $\exists a, b$ , such that  $vol(a, b) = 0$ . According to the definition of  $vol(a, b)$  in eq. (9), the inequality in eq. (43) must be tight. To make the second “ $\geq$ ” in eq. (43) tight, we have  $\forall i$ , the two vectors  $(s_{i1}^Y, \dots, s_{in}^Y)$  and  $(s_{i1}^Z, \dots, s_{in}^Z)$  are linearly dependant. Assume that  $\forall j, s_{ij}^Y = \lambda_i s_{ij}^Z$ . In this case, it is straightforward that

$$\forall a, \forall b, \forall i, \quad \tau_i^2(\mathbf{Y}, \kappa) g_{aa}^i = \tau_i^2(\mathbf{Z}, \kappa) g_{bb}^i \quad \text{and} \quad g_{aa}^i g_{bb}^i = (g_{ab}^i)^2.$$

This makes the inequality in eq. (43) always tight for any  $a$  and  $b$ . Therefore the Riemannian volume element in eq. (42) is everywhere zero, which leads to  $|\bar{\mathcal{H}}_\Omega| = 0$ .  $\square$

## References

- [Jost(2008)] Jost, J. *Riemannian Geometry and Geometric Analysis*. Springer, 5th edition, 2008.
- [Lebanon(2003)] Lebanon, G. Learning Riemannian metrics. In *UAI*, pp. 362–369, 2003.
